# Supplementary material for: Dietary Transfer of Zinc Oxide Nanoparticles Induces Locomotive Defects Associated with GABAergic Motor Neuron Damage in Caenorhabditis elegans
Source: MDPI journal article supplement (doi:10.3390/nano13020289), 2023-01-10

**Figure S1. TEM image of ZnO nanoparticles (ZnO-NPs) used in this study**

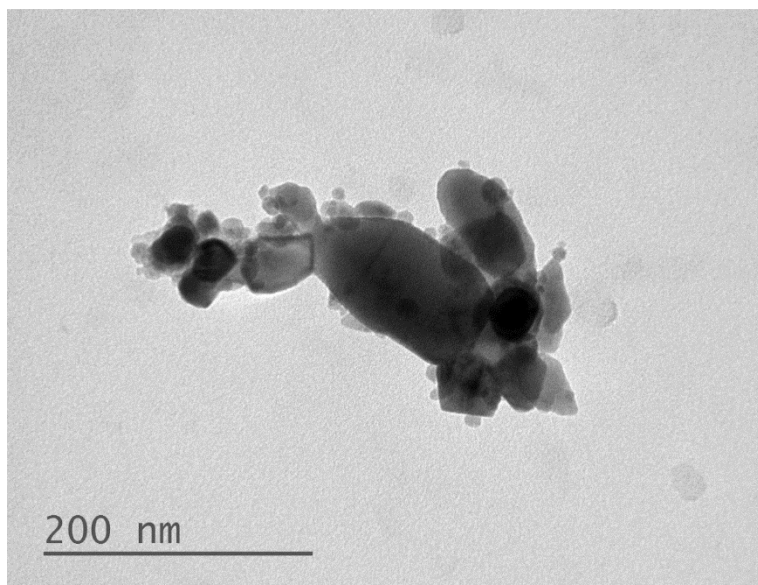

**Figure S2 Representative images of GABAergic neurons in *C. elegans* (A – C)**

**(A) Control**

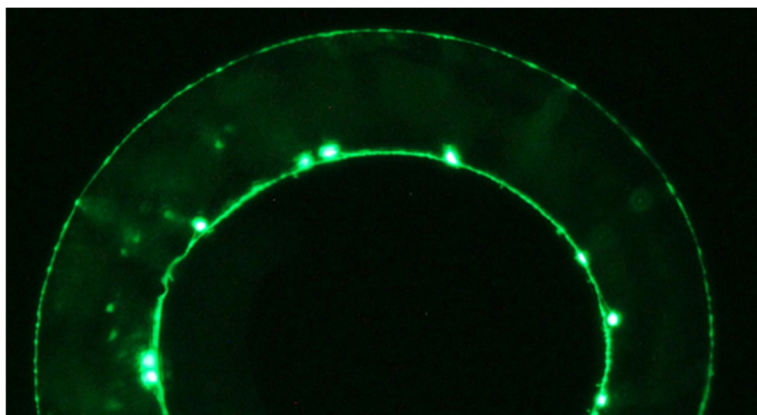

**(B) Fed on *E. coli* pretreated with 50 mg/L ZnCl<sub>2</sub>**

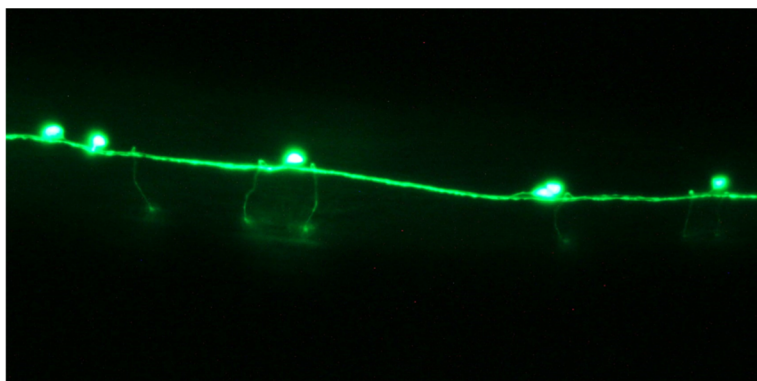

**(C) Fed on *E. coli* pretreated with 50 mg/L ZnO-NPs**

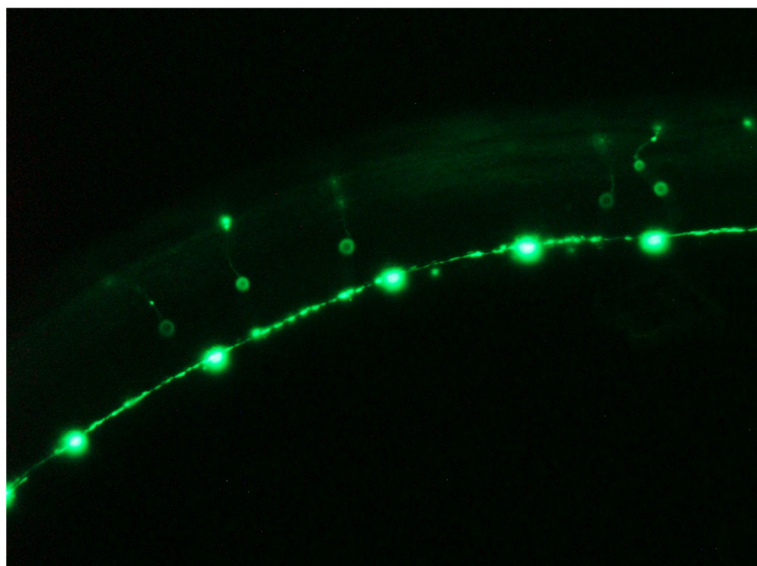

**Figure S3. Effects of ZnO-NPs and ZnCl<sub>2</sub> on cholinergic motor neurons**

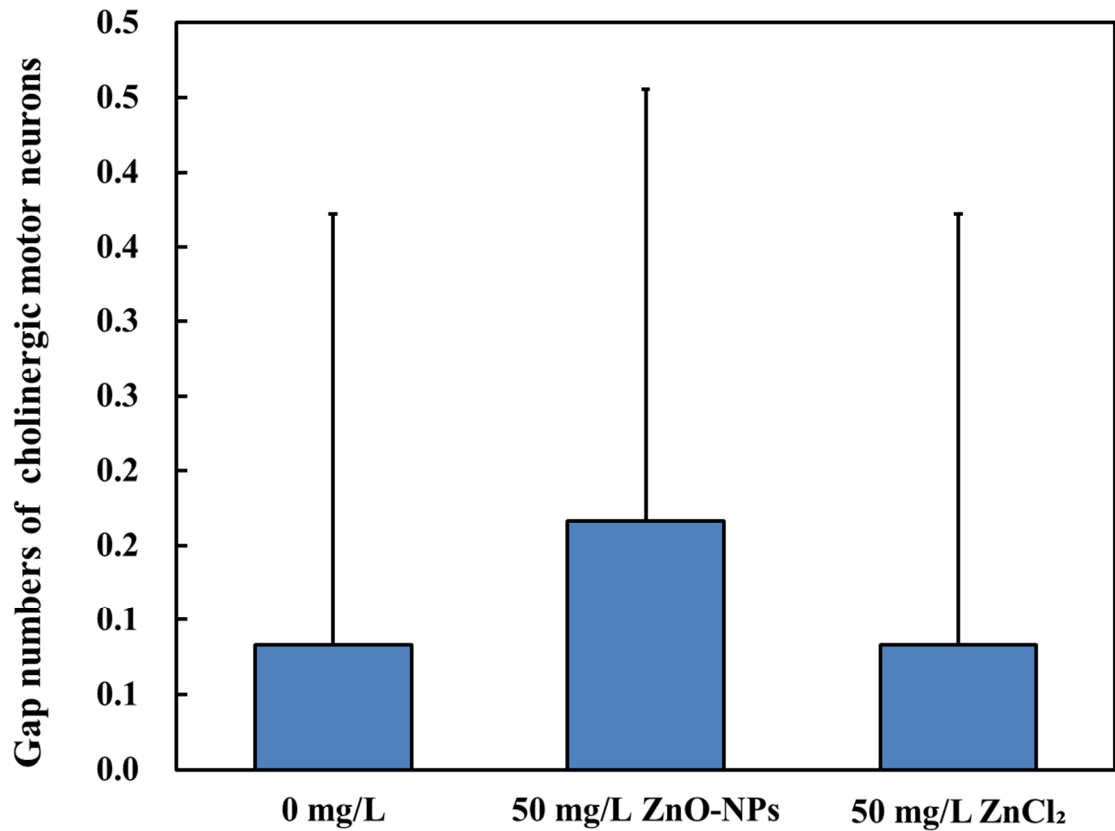

Supplement: s1 [file s1]
